# Supplementary material
Source: MDPI journal article supplement (https://www.mdpi.com/2071-1050/9/1/126)
Supplement: s1 [file s1]

Archive with 3 entries (3 files):
- sustainability-170487-S2.pdf
- sustainability-170487-S3.pdf
- sustainability-170487-S1.pdf
